# Supplementary material
Source: PubMed Central journal article supplement (PMC7869062)
Supplement: 10-1055-s-0040-1721664-s200754.pdf [file 10-1055-s-0040-1721664-s200754.pdf]

**Supplementary Table S1** PRISMA checklist

| Section/topic                      | Item No. | Checklist item                                                                                                                                                                                                                                                                                              | Reported on page number(s) |
|------------------------------------|----------|-------------------------------------------------------------------------------------------------------------------------------------------------------------------------------------------------------------------------------------------------------------------------------------------------------------|----------------------------|
| TITLE                              |          |                                                                                                                                                                                                                                                                                                             |                            |
| Title                              | 1        | Identify the report as a systematic review, meta-analysis, or both.<br>(Note: the report has been labeled as “a pooled analysis” in response to the suggestion from the reviewer and editor.)                                                                                                               | 76                         |
| ABSTRACT                           |          |                                                                                                                                                                                                                                                                                                             |                            |
| Structured summary                 | 2        | Provide a structured summary including, as applicable: background; objectives; data sources; study eligibility criteria, participants, and interventions; study appraisal and synthesis methods; results; limitations; conclusions and implications of key findings; systematic review registration number. | 76                         |
| INTRODUCTION                       |          |                                                                                                                                                                                                                                                                                                             |                            |
| Rationale                          | 3        | Describe the rationale for the review in the context of what is already known.                                                                                                                                                                                                                              | 77                         |
| Objectives                         | 4        | Provide an explicit statement of questions being addressed with reference to participants, interventions, comparisons, outcomes, and study design (PICOS).                                                                                                                                                  | 77                         |
| METHODS                            |          |                                                                                                                                                                                                                                                                                                             |                            |
| Protocol and registration          | 5        | Indicate if a review protocol exists, if and where it can be accessed (e.g., Web address), and, if available, provide registration information including registration number.                                                                                                                               | 77                         |
| Eligibility criteria               | 6        | Specify study characteristics (e.g., PICOS, length of follow-up) and report characteristics (e.g., years considered, language, publication status) used as criteria for eligibility, giving rationale.                                                                                                      | 77                         |
| Information sources                | 7        | Describe all information sources (e.g., databases with dates of coverage, contact with study authors to identify additional studies) in the search and date last searched.                                                                                                                                  | 77                         |
| Search                             | 8        | Present full electronic search strategy for at least one database, including any limits used, such that it could be repeated.                                                                                                                                                                               | 77                         |
| Study selection                    | 9        | State the process for selecting studies (i.e., screening, eligibility, included in a systematic review, and, if applicable, included in the meta-analysis).                                                                                                                                                 | 77                         |
| Data collection process            | 10       | Describe method of data extraction from reports (e.g., piloted forms, independently, in duplicate) and any processes for obtaining and confirming data from investigators.                                                                                                                                  | 77                         |
| Data items                         | 11       | List and define all variables for which data were sought (e.g., PICOS, funding sources) and any assumptions and simplifications made.                                                                                                                                                                       | 77                         |
| Risk of bias in individual studies | 12       | Describe methods used for assessing risk of bias of individual studies (including specification of whether this was done at the study or outcome level), and how this information is to be used in any data synthesis.                                                                                      | 77                         |
| Summary measures                   | 13       | State the principal summary measures (e.g., risk ratio, difference in means).                                                                                                                                                                                                                               | 77                         |
| Synthesis of results               | 14       |                                                                                                                                                                                                                                                                                                             | 77                         |

(Continued)

**Supplementary Table S1** (Continued)

| Section/topic                 | Item No. | Checklist item                                                                                                                                                                                               | Reported on page number(s)                                      |
|-------------------------------|----------|--------------------------------------------------------------------------------------------------------------------------------------------------------------------------------------------------------------|-----------------------------------------------------------------|
|                               |          | Describe the methods of handling data and combining results of studies, if done, including measures of consistency (e.g., $I^2$ ) for each meta-analysis.                                                    |                                                                 |
| Risk of bias across studies   | 15       | Specify any assessment of risk of bias that may affect the cumulative evidence (e.g., publication bias, selective reporting within studies).                                                                 | 78                                                              |
| Additional analyses           | 16       | Describe methods of additional analyses (e.g., sensitivity or subgroup analyses, meta-regression), if done, indicating which were prespecified.                                                              | 78                                                              |
| <b>RESULTS</b>                |          |                                                                                                                                                                                                              |                                                                 |
| Study selection               | 17       | Give numbers of studies screened, assessed for eligibility, and included in the review, with reasons for exclusions at each stage, ideally with a flow diagram.                                              | 78–79                                                           |
| Study characteristics         | 18       | For each study, present characteristics for which data were extracted (e.g., study size, PICOS, follow-up period) and provide the citations.                                                                 | 79 and ► <b>Supplementary Table S2</b>                          |
| Risk of bias within studies   | 19       | Present data on risk of bias of each study and, if available, any outcome level assessment (see item 12).                                                                                                    | 79 and ► <b>Supplementary Table S3</b>                          |
| Results of individual studies | 20       | For all outcomes considered (benefits or harms), present, for each study: (1) simple summary data for each intervention group and (2) effect estimates and confidence intervals, ideally with a forest plot. | ► <b>Fig. 2</b> and ► <b>Supplementary Figs. S2–S4</b>          |
| Synthesis of results          | 21       | Present results of each meta-analysis done, including confidence intervals and measures of consistency.                                                                                                      | 79–81, ► <b>Fig. 2</b> , and ► <b>Supplementary Figs. S2–S4</b> |
| Risk of bias across studies   | 22       | Present results of any assessment of risk of bias across studies (see item 15).                                                                                                                              | 79–81                                                           |
| Additional analysis           | 23       | Give results of additional analyses, if done (e.g., sensitivity or subgroup analyses, meta-regression [see item 16]).                                                                                        | 80–81                                                           |
| <b>DISCUSSION</b>             |          |                                                                                                                                                                                                              |                                                                 |
| Summary of evidence           | 24       | Summarize the main findings including the strength of evidence for each main outcome; consider their relevance to key groups (e.g., health care providers, users, and policy makers).                        | 81–82                                                           |
| Limitations                   | 25       | Discuss limitations at study and outcome levels (e.g., risk of bias), and at the review level (e.g., incomplete retrieval of identified research, reporting bias).                                           | 82                                                              |
| Conclusions                   | 26       | Provide a general interpretation of the results in the context of other evidence, and implications for future research.                                                                                      | 82–83                                                           |
| <b>FUNDING</b>                |          |                                                                                                                                                                                                              |                                                                 |
| Funding                       | 27       | Describe sources of funding for the systematic review and other support (e.g., supply of data); role of funders for the systematic review.                                                                   | 83                                                              |

Note: Adapted from Moher D, Liberati A, Tetzlaff J, Altman DG, The PRISMA Group. Preferred Reporting Items for Systematic Reviews and Meta-Analyses: The PRISMA Statement. *PLoS Med* 2009;6(7):e1000097.

Supplementary Table S2 Characteristics of included studies

| References                  | Country       | Study design         | Total (N) | Inclusion                                                                                                                                                                               | Exclusion                                                                                                                                             | Primary outcome                                                                           | Anticoagulant regimens                                                                                                                                                 | Screening for asymptomatic DVT                                                                                    | Baseline characteristics             |                                  |                      | History of VTE, N (%) |
|-----------------------------|---------------|----------------------|-----------|-----------------------------------------------------------------------------------------------------------------------------------------------------------------------------------------|-------------------------------------------------------------------------------------------------------------------------------------------------------|-------------------------------------------------------------------------------------------|------------------------------------------------------------------------------------------------------------------------------------------------------------------------|-------------------------------------------------------------------------------------------------------------------|--------------------------------------|----------------------------------|----------------------|-----------------------|
|                             |               |                      |           |                                                                                                                                                                                         |                                                                                                                                                       |                                                                                           |                                                                                                                                                                        |                                                                                                                   | Age, mean or median (SD or IQR)      | Male, N (%)                      | ICU admission, N (%) |                       |
| Al-Samkari et al 2020       | United States | Retrospective cohort | 400       | All patients aged ≥18 years with confirmed COVID-19 who had a D-dimer test performed on initial presentation                                                                            | NR                                                                                                                                                    | Bleeding and thrombotic events                                                            | Prophylaxis: enoxaparin 40 mg SC daily or unfractionated heparin 5,000 U SC every 8–12 h                                                                               | Not done                                                                                                          | ICU 65 (32–97); Non-ICU 60 (23–99)   | ICU (65); Non-ICU (54)           | 144 (36)             | NR                    |
| Aleva et al 2020            | Netherlands   | Retrospective cohort | 50        | Consecutive patients with COVID-19 admitted to ICU                                                                                                                                      | NR                                                                                                                                                    | VTE                                                                                       | All received low-dose LMWH                                                                                                                                             | Not done                                                                                                          | 65 (10)                              | 33 (66)                          | 50 (100)             | NR                    |
| Alonso-Fernández et al 2020 | Spain         | Prospective cohort   | 30        | Consecutive adult patients with confirmed COVID-19 pneumonia admitted to the hospital and with at least one D-dimer value higher than 1 µg/mL during hospitalization                    | Previous anticoagulant treatment in the 3 months prior to admission; CTPA performed before D-dimer rising above 1 µg/mL                               | PE                                                                                        | Prophylaxis: enoxaparin 40 mg OD                                                                                                                                       | Not done                                                                                                          | 64.5 (55.8–71.3)                     | 19 (63.3)                        | 11 (37.9)            | NR                    |
| Artifoni et al 2020         | France        | Retrospective cohort | 71        | All consecutive patients with confirmed COVID-19 hospitalized for more than 48 hours (age > 18 years, adequate thromboprophylaxis and available low limb venous duplex ultrasonography) | Previous anticoagulation and contraindication to thromboprophylaxis                                                                                   | VTE                                                                                       | Weight-appropriate enoxaparin (40 mg/d for BMI < 30 kg/m <sup>2</sup> ; 60 mg/d for BMI 30–40 kg/m <sup>2</sup> and 40 mg twice daily for BMI > 40 kg/m <sup>2</sup> ) | Lower limb venous duplex ultrasonography at hospital discharge or earlier if thrombosis was clinically suspected. | 64 (46–75)                           | 43 (61)                          | 0 (0)                | NR                    |
| Bompard et al 2020          | France        | Retrospective cohort | 135       | Patients with COVID-19 pneumonia who underwent CTPA                                                                                                                                     | CT examinations with major respiratory motion artifacts                                                                                               | PE                                                                                        | Enoxaparin 40 mg OD in ward patients, or BID in obese and ICU patients                                                                                                 | Not done                                                                                                          | 64 (54–76)                           | 94 (70)                          | 24 (18)              | NR                    |
| Chen et al 2020             | China         | Retrospective cohort | 88        | Critically ill COVID-19 patients in the ICU                                                                                                                                             | No pharmacological thromboprophylaxis, no surveillance results on DVT, thromboprophylaxis before ICU admission                                        | Incidence of DVT (distal and proximal DVT), risk factors of DVT, and bleeding events      | All of the patients had VTE pharmacologic thromboprophylaxis prescribed LMWH for more than 1 week                                                                      | Compression US                                                                                                    | 63 (55–71)                           | 54 (61)                          | 88 (100)             | NR                    |
| Cho et al 2020              | United States | Retrospective cohort | 158       | Consecutive hospitalized patients with confirmed COVID-19 status                                                                                                                        | Age < 18 or known DVT or PE prior to admission                                                                                                        | DVT detected on duplex US                                                                 | UFH 5,000 units every 8 hours or LMWH 40 mg per day                                                                                                                    | Venous duplex US                                                                                                  | 67.4 (14.6)                          | 85 (54)                          | NR                   | NR                    |
| Criel et al 2020            | Belgium       | Retrospective cohort | 82        | All patients hospitalized in the ICU and non-ICU ward due to SARS-CoV-2                                                                                                                 | Patients in a palliative phase and/or who were noncontributive, mostly due to agitation or impaired mental status                                     | Insidious VTE was investigated using Doppler ultrasonography of the upper and lower limbs | ICU: 40 mg enoxaparin BID (60 mg BID if > 100 kg) Non-ICU: 40 mg enoxaparin OD (60 mg OD if > 100 kg)                                                                  | Doppler ultrasonography of the upper and lower limbs                                                              | ICU 64.5 (11.8); Non-ICU 63.6 (14.4) | ICU 20 (67); Non-ICU 63.6 (14.4) | 30 (37)              | NR                    |
| Cui et al 2020              | China         | Retrospective cohort | 82        | Patients diagnosed with novel coronavirus pneumonia in the ICU                                                                                                                          | NR                                                                                                                                                    | NR                                                                                        | None                                                                                                                                                                   | Not done                                                                                                          | 59.9 (14.1)                          | 37 (46)                          | 81 (100)             | NR                    |
| Demelo-Rodriguez et al 2020 | Spain         | Prospective cohort   | 156       | All consecutive patients hospitalized in non-ICU units with diagnosis of COVID-19 pneumonia, D-dimer levels > 1,000 ng/mL and had been hospitalized for ≥48 hours                       | Receiving therapeutic doses of anticoagulation, had a history of DVT (of lower limbs, or had clinical signs or symptoms of DVT                        | Asymptomatic DVT                                                                          | Enoxaparin 40 mg per day or bemiparin 3,500 UI per day                                                                                                                 | Complete compression Doppler ultrasound (CCUS) of both legs                                                       | 68.1 (14.5)                          | 102 (65)                         | 0 (0)                | 2 (1)                 |
| Dugar et al 2020            | United States | Cross-sectional      | 18        | Consecutive patients with COVID-19 admitted to ICU                                                                                                                                      | Missing data, repeat scans, scanned beyond 72 hours                                                                                                   | DVT                                                                                       | All received thromboprophylaxis                                                                                                                                        | Point of care US within 72 hours after admission                                                                  | 66.74 (10.95)                        | NR                               | 18 (100)             | NR                    |
| Faivel et al 2020           | France        | Retrospective cohort | 1,240     | Consecutive adult patients admitted with a diagnosis of SARS-CoV-2 infection                                                                                                            | Patients without CTPA to diagnose PE, those who were directly admitted to the ICU on their arrival, and those who were still hospitalized and had not | PE confirmed by CTPA                                                                      | Prophylactic dose (daily LMWH or twice daily subcutaneous UFH); intermediate dose (double the preventive dose)                                                         | Not done                                                                                                          | 64 (17)                              | 721 (58)                         | 185 (14.9)           | NR                    |

(Continued)

Supplementary Table S2 (Continued)

| References             | Country       | Study design               | Total (N) | Inclusion                                                                                                                 | Exclusion                                                                                                        | Primary outcome                                                                                                             | Anticoagulant regimens                                                                                                                                                                                                                                                                 | Screening for asymptomatic DVT                                                                                 | Baseline characteristics        |             |                      |                      | History of VTE, N (%) |
|------------------------|---------------|----------------------------|-----------|---------------------------------------------------------------------------------------------------------------------------|------------------------------------------------------------------------------------------------------------------|-----------------------------------------------------------------------------------------------------------------------------|----------------------------------------------------------------------------------------------------------------------------------------------------------------------------------------------------------------------------------------------------------------------------------------|----------------------------------------------------------------------------------------------------------------|---------------------------------|-------------|----------------------|----------------------|-----------------------|
|                        |               |                            |           |                                                                                                                           |                                                                                                                  |                                                                                                                             |                                                                                                                                                                                                                                                                                        |                                                                                                                | Age, mean or median (SD or IQR) | Male, N (%) | ICU admission, N (%) | ICU admission, N (%) |                       |
| Grandmaison et al 2020 | Switzerland   | Cross-sectional            | 29        | All patients hospitalized with ARDS or pneumonia, and a SARS-CoV-2-positive PCR test                                      | NR                                                                                                               | VTE                                                                                                                         | Prophylaxis: enoxaparin 40 mg/d or UFH 5,000 units twice a day<br>Therapeutic: not listed                                                                                                                                                                                              | Complete duplex ultrasound of the neck, of the upper, and of the lower limb veins in all patients              | 66 (37-79)                      | 11 (65)     | 29 (100)             | 1 (6)                |                       |
| Hanif et al 2020       | United States | Retrospective cohort       | 921       | Consecutive patients admitted with COVID-19                                                                               | Patients who were discharged from emergency room and who were admitted for reasons other than COVID-19 pneumonia | Thrombotic complications and clinically significant bleeding                                                                | LMWH, UFH, DOACs                                                                                                                                                                                                                                                                       | Not done                                                                                                       | 62 (NR)                         | 574 (62.3)  | NR                   | NR                   |                       |
| Klok et al 2020        | Netherlands   | Retrospective cohort       | 184       | Consecutive patients admitted for COVID-19 to ICU                                                                         | None                                                                                                             | PE, DVT, ischemic stroke, myocardial infarction, or systemic arterial embolism                                              | Nadroparin 2,850 IU SC per day or 5,700 IU per day if >100 kg; nadroparin 5,700 IU per day; nadroparin 5,700 IU twice daily from April 4, 2020 and onwards; nadroparin 2,850 IU SC per day or 5,700 IU per day if >100 kg; nadroparin 5,700 IU per day from March 30, 2020 and onwards | Not done                                                                                                       | 64 (12)                         | 139 (76)    | 184 (100)            | NR                   |                       |
| Kodielat et al 2020    | United States | Retrospective case-control | 131       | Consecutive patients admitted for COVID-19 who underwent Duplex scan                                                      | NR                                                                                                               | Distal or proximal DVT on duplex scan                                                                                       | Subcutaneous heparin, enoxaparin, oral apixaban<br>Therapeutic heparin, bivalirudin, and apixaban                                                                                                                                                                                      | Not done                                                                                                       | NR                              | NR          | NR                   | 10 (7.6)             |                       |
| Le Jeune et al 2020    | France        | Retrospective cohort       | 42        | Consecutive patients in general ward                                                                                      | NR                                                                                                               | VTE                                                                                                                         | Prophylaxis: intermediate, and therapeutic thromboprophylaxis                                                                                                                                                                                                                          | Complete Doppler ultrasound                                                                                    | 64.5 (19.3)                     | 23 (55)     | NR                   | NR                   |                       |
| Ulljoes et al 2020     | France        | Retrospective cohort       | 26        | Consecutive patients admitted for COVID-19 to ICU                                                                         | NR                                                                                                               | VTE by complete duplex ultrasound                                                                                           | Prophylactic AC; therapeutic was LMWH or UFH with Xa monitoring                                                                                                                                                                                                                        | Screening for asymptomatic VTE by ultrasound                                                                   | 68 (51.5-74.5)                  | 20 (77)     | 26 (100)             | 1(4)                 |                       |
| Lodigiani et al 2020   | Italy         | Retrospective cohort       | 388       | Consecutive patients admitted for COVID-19                                                                                | NR                                                                                                               | Distal or proximal DVT, PE, or venous thrombosis at other sites including catheter-related thrombosis, stroke and M/INSTEMI | LMWH in ICU, fondaparinux, heparin                                                                                                                                                                                                                                                     | Not done                                                                                                       | 66 (55-75)                      | 264 (68)    | 61 (16)              | 12 (3.1)             |                       |
| Longchamp et al 2020   | Switzerland   | Prospective Cohort         | 25        | Patients with laboratory-confirmed COVID-19 infection who were admitted to hospital ICU for hypoxemic respiratory failure | None                                                                                                             | Distal or proximal DVT and PE, diagnosed by imaging                                                                         | UFH infusion (15,000 IU/24 h, or 20,000 IU/24 h for patients > 100 kg), or enoxaparin OD (40 mg, or 60 mg for patients >100 kg)                                                                                                                                                        | Screening lower limb venous compression ultrasound performed by 2 specialists between day 5 and 10 of ICU stay | 68 (11)                         | 16 (64)     | 25 (100)             | 0                    |                       |
| Mattoli et al 2020     | Italy         | Retrospective cohort       | 105       | Consecutive patients with laboratory-confirmed COVID-19                                                                   | Discharged, dead, or transferred to ICU within 48 hours of admission                                             | Thrombosis                                                                                                                  | Enoxaparin 89 mg/d in normal weight and adequate renal function, 40 mg/d in severe renal failure or low body weight and 100 mg/d for obese                                                                                                                                             | Not done                                                                                                       | 74 ± 14.6                       | 61 (58)     | NR                   | NR                   |                       |
| Mei et al 2020         | China         | Retrospective cohort       | 256       | Consecutive patients admitted for COVID-19 to ICU                                                                         | NR                                                                                                               | Not specified                                                                                                               | Standard protocol of LMWH and UFH                                                                                                                                                                                                                                                      | Not done                                                                                                       | 55.5 (0.5-87)                   | 131 (51.2)  | 45                   | 0                    |                       |

Supplementary Table S2 (Continued)

| References              | Country       | Study design               | Total (N) | Inclusion                                                                | Exclusion                                                                                   | Primary outcome                                                                                       | Anticoagulant regimens                                                                                                                                                                  | Screening for asymptomatic DVT                                                      | Baseline characteristics        |             |                      | History of VTE, N (%)        |
|-------------------------|---------------|----------------------------|-----------|--------------------------------------------------------------------------|---------------------------------------------------------------------------------------------|-------------------------------------------------------------------------------------------------------|-----------------------------------------------------------------------------------------------------------------------------------------------------------------------------------------|-------------------------------------------------------------------------------------|---------------------------------|-------------|----------------------|------------------------------|
|                         |               |                            |           |                                                                          |                                                                                             |                                                                                                       |                                                                                                                                                                                         |                                                                                     | Age, mean or median (SD or IQR) | Male, N (%) | ICU admission, N (%) |                              |
| Middeldorp et al 2020   | Netherlands   | Retrospective cohort       | 198       | Consecutive patients admitted for COVID-19                               | Patients who were diagnosed with COVID-19 during hospital stay for other medical reasons    | Distal or proximal DVT, PE, or venous thrombosis at other sites including catheter-related thrombosis | Ward (prophylaxis): nadroparin 2,850 IU OD or 5,700 IU for $\geq$ 100 kg ICU (therapeutic): nadroparin 2,850 IU BID or 5,700 IU for $\geq$ 100 kg                                       | Screening for lower extremity DVT in 55 patients (28%); ICU 38, ward 17             | 61 (14)                         | 130 (66)    | 75 (38)              | 11 (5.6)                     |
| Moll et al 2020         | United States | Retrospective cohort       | 210       | Consecutive patients admitted for COVID-19                               | Readmissions                                                                                | Symptomatic VTE                                                                                       | Enoxaparin 40 mg OD, or UFH 5,000 IU SC BID or TID                                                                                                                                      | Not done                                                                            | 62.2 (16.2)                     | 101 (48.1)  | 102                  | 9 (4.3)                      |
| Nadlami et al 2020      | United States | Retrospective cohort       | 4,389     | Consecutive adult patients with laboratory-confirmed COVID-19            | NR                                                                                          | Bleeding                                                                                              | Prophylaxis and Therapeutic                                                                                                                                                             | Not done                                                                            | 65 (53-777)                     | 2,957 (66)  | NR                   | NR                           |
| Nahum et al 2020        | France        | Prospective Cohort         | 34        | Consecutive patients admitted for COVID-19 to ICU with severe COVID/ARDS | NR                                                                                          | Distal or proximal DVT diagnosed by imaging                                                           | Not specified                                                                                                                                                                           | Screening for asymptomatic VTE by ultrasound                                        | 62.2 (8.6)                      | 25 (78)     | 34 (100)             | NR                           |
| Paolisso et al 2020     | Italy         | Retrospective cohort       | 361       | Consecutive patients with laboratory-confirmed COVID-19                  | NR                                                                                          | Mortality                                                                                             | Enoxaparin 40-60 mg/d, enoxaparin 40-60 twice daily                                                                                                                                     | Not done                                                                            | 67 (55-78)                      | 283 (63)    | 70 (15.6)            | NR                           |
| Pesavento et al 2020    | Italy         | Retrospective cohort       | 324       | Consecutive patients admitted for COVID-19                               | ICU care                                                                                    | Bleeding (secondary outcomes; symptomatic VTE)                                                        | Prophylactic: UFH up to 15,000 IU, enoxaparin up to 4,000 IU, and fondaparinux up to 2.5 mg. Intermediate: higher daily doses, usually adjusted to body weight or laboratory parameters | Not done                                                                            | 71 (59-82)                      | 181 (55.9%) | NR                   | NR                           |
| Pizzolo et al 2020      | Italy         | Cross-sectional            | 43        | Consecutive patients                                                     | NR                                                                                          | DVT rate                                                                                              | Enoxaparin 4,000-5,000 IU/d or heparin 5,000 U 2-3/d                                                                                                                                    | Ultrasound                                                                          | 66 (28-96)                      | 29 (77)     | 10 (23.3%)           | NR                           |
| Ren et al 2020          | China         | Cross-sectional            | 48        | Consecutive patients admitted for COVID-19 to ICU                        | Prior DVT or recent surgery                                                                 | Distal or proximal DVT diagnosed by imaging                                                           | 30-40 mg of LMWH daily                                                                                                                                                                  | Screening for asymptomatic VTE by ultrasound                                        | 70 (62-80)                      | 26 (54.2)   | 48 (100)             | 0                            |
| Santoliquido et al 2020 | Italy         | Cross-sectional            | 84        | Non-ICU consecutive patients hospitalized for COVID-19                   | Younger than 18, hospitalized in the ICU, and those receiving prior anticoagulation therapy | Determine the incidence of VTE                                                                        | Pharmacological prophylaxis: enoxaparin 40 mg OD or fondaparinux 2.5 mg OD                                                                                                              | A screening for DVT was performed in all patients                                   | 67.6 (13.5)                     | 61 (72.6)   | 0 (0)                | 3 (3.6)                      |
| Tavazzi et al 2020      | Italy         | Retrospective cohort       | 54        | Consecutive patients admitted for COVID-19 to the ICU                    | Patients not admitted to the ICU                                                            | Incidence of VTE                                                                                      | LMWH adjusted on body weight in all patients                                                                                                                                            | All patients were screened for VTEs                                                 | 68 (7)                          | (83)        | 54 (100)             | NR                           |
| Thomas et al 2020       | England       | Retrospective cohort       | 63        | Consecutive patients admitted for COVID-19 with confirmed thrombosis     | NR                                                                                          | Incidence of VTE                                                                                      | Weight-based dalteparin                                                                                                                                                                 | Not done                                                                            | NR                              | 44 (69)     | 63 (100)             | 1 (2)                        |
| Trimaile et al 2020     | France        | Retrospective cohort       | 289       | Consecutive patients admitted for COVID-19                               | Patients who did not display CT features of COVID-19 pneumonia                              | Confirmed diagnosis of VTE                                                                            | Prophylaxis: enoxaparin 40 mg OD, fondaparinux 2.5 mg OD, or UFH at 200 IU per hour Reinforced prophylaxis: enoxaparin 40 mg BID                                                        | Not done                                                                            | 62.2 (17)                       | 171         | 72 (25)              | PE: 9 (3.1)<br>DVT: 19 (6.6) |
| Zhang et al 2020        | China         | Retrospective case-control | 143       | Consecutive patients admitted for COVID-19                               | Patients not admitted to the hospital wards in which they actively screened for DVT         | Confirmed diagnosis of VTE                                                                            | Prophylaxis: LMWH (dose not specified)                                                                                                                                                  | All patients were screened for DVT using lower extremity venous ultrasound scanning | 63 (14)                         | 74 (51.7)   | NR                   | 1 (0.7)                      |

Abbreviations: BID, twice daily; DVT, deep vein thrombosis; ICU, intensive care unit; LMWH, low-molecular-weight heparin; NR, not reported; OD, once daily; PE, pulmonary embolism; SC, subcutaneous; US, ultrasonography; VTE, venous thromboembolism.

**Supplementary Table S3** Quality assessment of included studies

| References                  | 1. A clearly stated aim | 2. Inclusion of consecutive patients | 3. Prospective collection of data | 4. Endpoints appropriate to the aim of the study | 5. Unbiased assessment of the study endpoint | 6. Follow-up period appropriate to the aim of the study | 7. Loss to follow-up less than 5% | 8. Prospective calculation of the study size | 9. An adequate control group | 10. Contemporary groups | 11. Baseline equivalence of groups | 12. Adequate statistical analyses | Total score | Risk of bias |
|-----------------------------|-------------------------|--------------------------------------|-----------------------------------|--------------------------------------------------|----------------------------------------------|---------------------------------------------------------|-----------------------------------|----------------------------------------------|------------------------------|-------------------------|------------------------------------|-----------------------------------|-------------|--------------|
| Al-Samirani et al 2020      | 2                       | 2                                    | 1                                 | 2                                                | 2                                            | 2                                                       | 2                                 | 0                                            | N/A                          | N/A                     | N/A                                | N/A                               | 13          | Low          |
| Aleiva et al 2020           | 2                       | 2                                    | 1                                 | 2                                                | 0                                            | 2                                                       | 2                                 | 0                                            | N/A                          | N/A                     | N/A                                | N/A                               | 11          | Moderate     |
| Alonso-Fernández et al 2020 | 2                       | 2                                    | 2                                 | 2                                                | 1                                            | 2                                                       | 2                                 | 0                                            | N/A                          | N/A                     | N/A                                | N/A                               | 13          | Low          |
| Artifoni et al 2020         | 2                       | 2                                    | 1                                 | 2                                                | 1                                            | 2                                                       | 2                                 | 0                                            | N/A                          | N/A                     | N/A                                | N/A                               | 12          | Moderate     |
| Bompard et al 2020          | 2                       | 2                                    | 1                                 | 2                                                | 1                                            | 2                                                       | 2                                 | 0                                            | N/A                          | N/A                     | N/A                                | N/A                               | 12          | Moderate     |
| Chen et al 2020             | 2                       | 2                                    | 1                                 | 2                                                | 2                                            | 2                                                       | 2                                 | 0                                            | N/A                          | N/A                     | N/A                                | N/A                               | 13          | Low          |
| Cho et al 2020              | 2                       | 2                                    | 1                                 | 2                                                | 1                                            | 2                                                       | 2                                 | 0                                            | N/A                          | N/A                     | N/A                                | N/A                               | 12          | Moderate     |
| Criel et al 2020            | 2                       | 2                                    | 1                                 | 1                                                | 2                                            | 2                                                       | 2                                 | 0                                            | N/A                          | N/A                     | N/A                                | N/A                               | 12          | Moderate     |
| Cui et al 2020              | 2                       | 2                                    | 1                                 | 2                                                | 1                                            | 2                                                       | 2                                 | 0                                            | N/A                          | N/A                     | N/A                                | N/A                               | 12          | Moderate     |
| Demelo-Rodriguez et al 2020 | 2                       | 2                                    | 2                                 | 2                                                | 1                                            | 2                                                       | 2                                 | 0                                            | N/A                          | N/A                     | N/A                                | N/A                               | 13          | Low          |
| Dugar et al 2020            | 2                       | 2                                    | 1                                 | 2                                                | 1                                            | 1                                                       | 2                                 | 0                                            | N/A                          | N/A                     | N/A                                | N/A                               | 11          | Moderate     |
| Fauvel et al 2020           | 2                       | 2                                    | 1                                 | 2                                                | 2                                            | 2                                                       | 2                                 | 0                                            | N/A                          | N/A                     | N/A                                | N/A                               | 13          | Low          |
| Grandmaison et al 2020      | 2                       | 2                                    | 1                                 | 2                                                | 1                                            | 2                                                       | 2                                 | 0                                            | N/A                          | N/A                     | N/A                                | N/A                               | 12          | Moderate     |
| Hanif et al 2020            | 2                       | 2                                    | 1                                 | 2                                                | 1                                            | 1                                                       | 2                                 | 0                                            | N/A                          | N/A                     | N/A                                | N/A                               | 11          | Moderate     |
| Klok et al 2020             | 2                       | 2                                    | 1                                 | 2                                                | 0                                            | 2                                                       | 2                                 | 0                                            | N/A                          | N/A                     | N/A                                | N/A                               | 11          | Moderate     |
| Koleilat et al 2020         | 2                       | 1                                    | 0                                 | 2                                                | 0                                            | 2                                                       | 2                                 | 0                                            | N/A                          | N/A                     | N/A                                | N/A                               | 9           | Moderate     |
| Le Jeune et al 2020         | 2                       | 2                                    | 2                                 | 2                                                | 0                                            | 2                                                       | 2                                 | 0                                            | N/A                          | N/A                     | N/A                                | N/A                               | 12          | Moderate     |
| Litjos et al 2020           | 2                       | 2                                    | 2                                 | 2                                                | 1                                            | 2                                                       | 2                                 | 0                                            | N/A                          | N/A                     | N/A                                | N/A                               | 13          | Low          |
| Lodigiani et al 2020        | 2                       | 2                                    | 1                                 | 2                                                | 0                                            | 2                                                       | 2                                 | 0                                            | N/A                          | N/A                     | N/A                                | N/A                               | 11          | Moderate     |
| Longchamp et al 2020        | 2                       | 2                                    | 2                                 | 2                                                | 0                                            | 2                                                       | 2                                 | 0                                            | N/A                          | N/A                     | N/A                                | N/A                               | 12          | Moderate     |
| Mattiolli et al 2020        | 2                       | 2                                    | 0                                 | 2                                                | 1                                            | 2                                                       | 2                                 | 0                                            | N/A                          | N/A                     | N/A                                | N/A                               | 11          | Moderate     |
| Mei et al 2020              | 2                       | 2                                    | 1                                 | 1                                                | 0                                            | 2                                                       | 2                                 | 0                                            | N/A                          | N/A                     | N/A                                | N/A                               | 10          | Moderate     |
| Middelcorp et al 2020       | 2                       | 2                                    | 1                                 | 2                                                | 2                                            | 2                                                       | 2                                 | 0                                            | N/A                          | N/A                     | N/A                                | N/A                               | 13          | Low          |
| Moll et al 2020             | 2                       | 2                                    | 1                                 | 2                                                | 2                                            | 2                                                       | 2                                 | 0                                            | N/A                          | N/A                     | N/A                                | N/A                               | 13          | Low          |
| Nadkarni et al 2020         | 2                       | 2                                    | 0                                 | 2                                                | 0                                            | 2                                                       | 2                                 | 0                                            | N/A                          | N/A                     | N/A                                | N/A                               | 10          | Moderate     |
| Nahum et al 2020            | 2                       | 2                                    | 2                                 | 2                                                | 1                                            | 2                                                       | 2                                 | 0                                            | N/A                          | N/A                     | N/A                                | N/A                               | 13          | Low          |
| Paolisso et al 2020         | 2                       | 2                                    | 0                                 | 2                                                | 1                                            | 2                                                       | 2                                 | 0                                            | N/A                          | N/A                     | N/A                                | N/A                               | 11          | Moderate     |
| Pesavento et al 2020        | 2                       | 2                                    | 1                                 | 2                                                | 2                                            | 2                                                       | 2                                 | 0                                            | N/A                          | N/A                     | N/A                                | N/A                               | 13          | Low          |
| Pizzolo et al 2020          | 2                       | 1                                    | 2                                 | 1                                                | 1                                            | 2                                                       | 2                                 | 0                                            | N/A                          | N/A                     | N/A                                | N/A                               | 11          | Moderate     |
| Ren et al 2020              | 2                       | 1                                    | 2                                 | 2                                                | 2                                            | 2                                                       | 2                                 | 0                                            | N/A                          | N/A                     | N/A                                | N/A                               | 13          | Low          |
| Santoliquido et al 2020     | 2                       | 2                                    | 1                                 | 2                                                | 0                                            | 2                                                       | 2                                 | 0                                            | N/A                          | N/A                     | N/A                                | N/A                               | 11          | Moderate     |
| Tavazzi et al 2020          | 2                       | 2                                    | 1                                 | 2                                                | 0                                            | 2                                                       | 2                                 | 0                                            | N/A                          | N/A                     | N/A                                | N/A                               | 11          | Moderate     |
| Thomas et al 2020           | 2                       | 2                                    | 1                                 | 2                                                | 0                                            | 2                                                       | 2                                 | 0                                            | N/A                          | N/A                     | N/A                                | N/A                               | 11          | Moderate     |
| Trimaile et al 2020         | 2                       | 2                                    | 0                                 | 2                                                | 0                                            | 2                                                       | 2                                 | 0                                            | N/A                          | N/A                     | N/A                                | N/A                               | 10          | Moderate     |
| Zhang et al 2020            | 2                       | 2                                    | 1                                 | 2                                                | 0                                            | 2                                                       | 2                                 | 0                                            | N/A                          | N/A                     | N/A                                | N/A                               | 11          | Moderate     |

**Supplementary Table S4** Sensitivity analysis performed on selected studies including critical care populations, studies that included systematic screening, studies with lower risk of bias, and studies that included only objectively confirmed thrombotic events on imaging

| Outcomes                                      |                                      | No prophylaxis   | Standard-dose prophylaxis | Intermediate-dose prophylaxis | Therapeutic anticoagulants | Overall p-value <sup>a</sup> |
|-----------------------------------------------|--------------------------------------|------------------|---------------------------|-------------------------------|----------------------------|------------------------------|
| ICU population                                |                                      |                  |                           |                               |                            |                              |
| Total VTE <sup>b</sup>                        | No. of participants (No. of studies) | 83 (2)           | 679 (13)                  | 129 (3)                       | 93 (4)                     |                              |
|                                               | Pooled incidence, % (95%CI)          | 45.5 (6.2–91.3)  | 38.6 (25.9–53.0)          | 36.0 (17.9–59.1)              | 30.7 (14.5–53.7)           | 0.93                         |
|                                               | I <sup>2</sup> , %                   | 67               | 89                        | 79                            | 58                         |                              |
| Studies requiring systematic screening        |                                      |                  |                           |                               |                            |                              |
| Total VTE                                     | No. of participants (No. of studies) | 16 (2)           | 828 (14)                  | 40 (2)                        | 20 (2)                     |                              |
|                                               | Pooled incidence, % (95%CI)          | 50.9 (12.9–87.8) | 34.8 (23.0–48.9)          | 12.6 (5.3–26.9)               | 47.5 (18.7–78.1)           | 0.05                         |
|                                               | I <sup>2</sup> , %                   | 44               | 90                        | 0                             | 22                         |                              |
| Studies with low risk of bias by MINORS score |                                      |                  |                           |                               |                            |                              |
| Total VTE                                     | No. of participants (No. of studies) | 4 (1)            | 1,984 (11)                | 174 (2)                       | 123 (3)                    |                              |
|                                               | Pooled incidence, % (95%CI)          | 7.5 (23.8–96.6)  | 21.4 (8.1–45.6)           | 18.2 (1.4–77.5)               | 12.3 (1.0–65.1)            | 0.24                         |
|                                               | I <sup>2</sup> , %                   | 0                | 97                        | 96                            | 92                         |                              |
| Studies with objectively confirmed VTE        |                                      |                  |                           |                               |                            |                              |
| Total VTE                                     | No. of participants (No. of studies) | 275 (7)          | 3,299 (27)                | 353 (7)                       | 214 (7)                    |                              |
|                                               | Pooled incidence, % (95%CI)          | 41.9 (28.1–57.2) | 20.7 (13.7–30.0)          | 15.4 (5.8–34.9)               | 10.0 (2.9–29.2)            | 0.01                         |
|                                               | I <sup>2</sup> , %                   | 76               | 95                        | 90                            | 80                         |                              |

Abbreviations: CI, confidence intervals; VTE, venous thromboembolism.

<sup>a</sup>p-Values were derived from the Q-test for heterogeneity among the four pharmacologic thromboprophylaxis strategy groups. A p-value of <0.05 was considered significant for between-group heterogeneity.

<sup>b</sup>Total VTE included symptomatic or asymptomatic VTE (lower and upper extremity DVT, PE, and catheter-associated thrombosis).

**Supplementary Table S5** Sensitivity analysis according to geographic location

| Outcomes                |                                      | No prophylaxis   | Standard-dose prophylaxis | Intermediate-dose prophylaxis | Therapeutic anticoagulants | Overall p-value <sup>a1</sup> |
|-------------------------|--------------------------------------|------------------|---------------------------|-------------------------------|----------------------------|-------------------------------|
| Europe                  |                                      |                  |                           |                               |                            |                               |
| Total VTE <sup>b2</sup> | No. of participants (No. of studies) | 90 (4)           | 2,290 (18)                | 458 (8)                       | 317 (7)                    |                               |
|                         | Pooled incidence, % (95%CI)          | 53.6 (24.5–80.5) | 17.7 (10.9–27.3)          | 11.9 (4.3–28.6)               | 11.7 (4.0–29.5)            | 0.045                         |
|                         | I <sup>2</sup> , %                   | 78               | 93                        | 90                            | 85                         |                               |
| Bleeding <sup>c</sup>   | No. of participants (No. of studies) | –                | 361 (1)                   | 194 (2)                       | –                          |                               |
|                         | Pooled incidence, % (95%CI)          | –                | 0.6 (0.1–2.2)             | 2.1 (0.8–5.4)                 | –                          | 0.13                          |
|                         | I <sup>2</sup> , %                   | –                | 0                         | 0                             | –                          |                               |
| North America           |                                      |                  |                           |                               |                            |                               |
| Total VTE               | No. of participants (No. of studies) | 14 (1)           | 771 (5)                   | –                             | 44 (2)                     |                               |
|                         | Pooled incidence, % (95%CI)          | 35.7 (15.7–62.4) | 14.3 (5.4–32.8)           | –                             | 7.1 (2.3–19.8)             | 0.049                         |
|                         | I <sup>2</sup> , %                   | 0                | 95                        | –                             | 0                          |                               |
| Bleeding                | No. of participants (No. of studies) | 936 (3)          | 1,026 (2)                 | –                             | 249 (2)                    |                               |
|                         | Pooled incidence, % (95%CI)          | 6.7 (2.2–19.0)   | 1.4 (0.8–2.4)             | –                             | 10.9 (7.6–15.4)            | <0.001                        |
|                         | I <sup>2</sup> , %                   | 71               | 3                         | –                             | 0                          |                               |
| China                   |                                      |                  |                           |                               |                            |                               |
| Total VTE               | No. of participants (No. of studies) | 171 (2)          | 445 (4)                   | –                             | –                          |                               |
|                         | Pooled incidence, % (95%CI)          | 36.1 (16.5–61.8) | 34.3 (8.7–74.0)           | –                             | –                          | 0.94                          |
|                         | I <sup>2</sup> , %                   | 90               | 97                        | –                             | –                          |                               |
| Bleeding                | No. of participants (No. of studies) | –                | 88 (1)                    | –                             | –                          |                               |
|                         | Pooled incidence, % (95%CI)          | –                | 5.7 (2.4–12.9)            | –                             | –                          | –                             |
|                         | I <sup>2</sup> , %                   | –                | 0                         | –                             | –                          |                               |

Abbreviations: CI, confidence intervals; VTE, venous thromboembolism.

<sup>c</sup>Bleeding events were extracted as defined by individual studies.



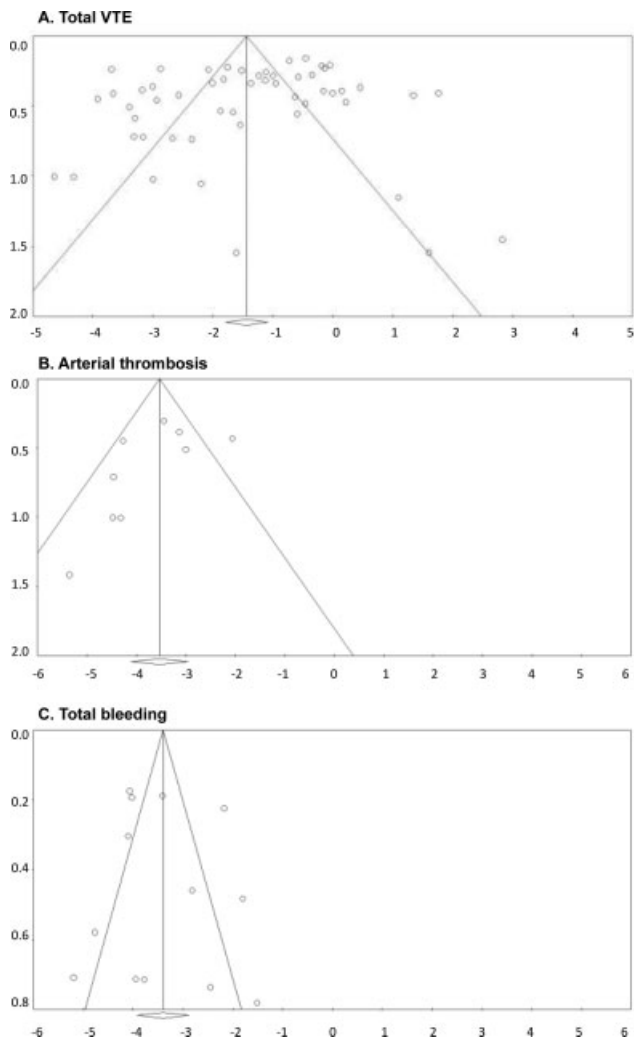

**Supplementary Fig. S1** Funnel plots for assessment of publication bias. The standard error is plotted on the vertical axis as a function of logit event rate on the horizontal axis.

- <sup>a</sup> *p*-Values were derived from the Q-test for heterogeneity among the four pharmacologic thromboprophylaxis strategy groups. A *p*-value of <0.05 was considered significant for between-group heterogeneity.
- <sup>b</sup> Total VTE included symptomatic or asymptomatic VTE (lower and upper extremity DVT, PE, and catheter-associated thrombosis).

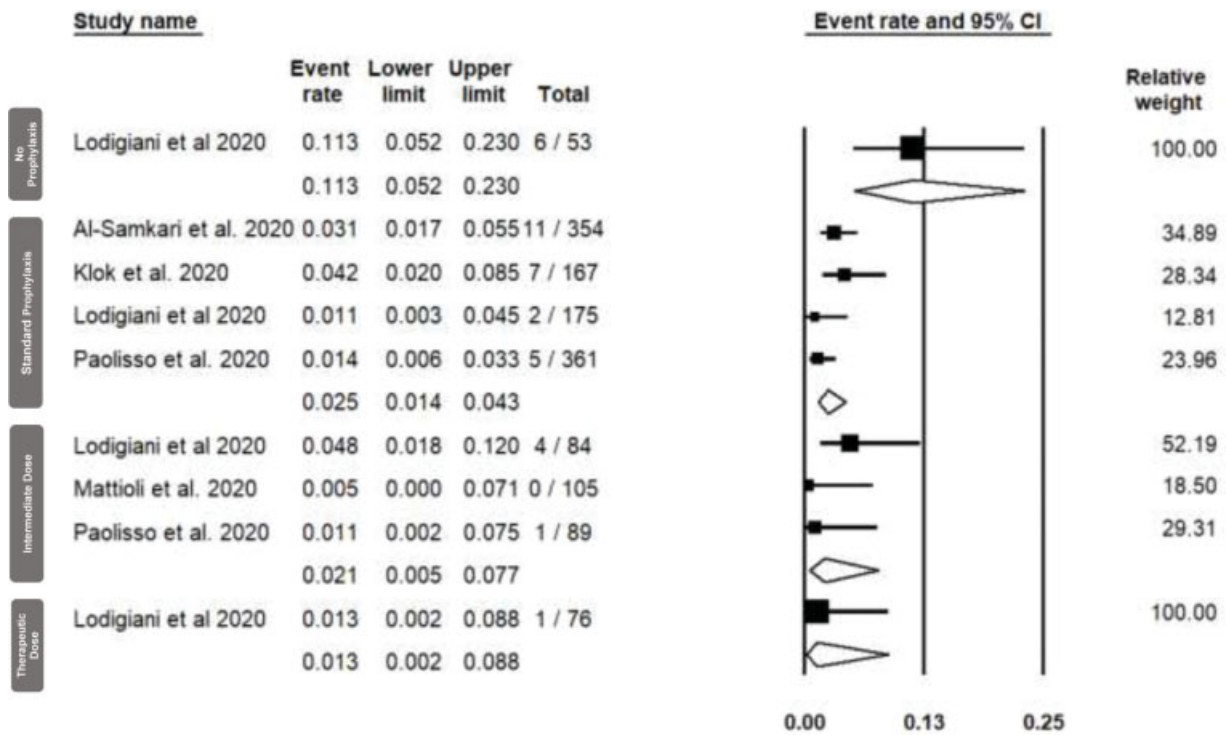

Supplementary Fig. S2 Forest plots showing pooled of total arterial thrombosis in each pharmacologic thromboprophylaxis strategy. Arterial thrombosis included acute coronary syndrome and cerebrovascular accidents.

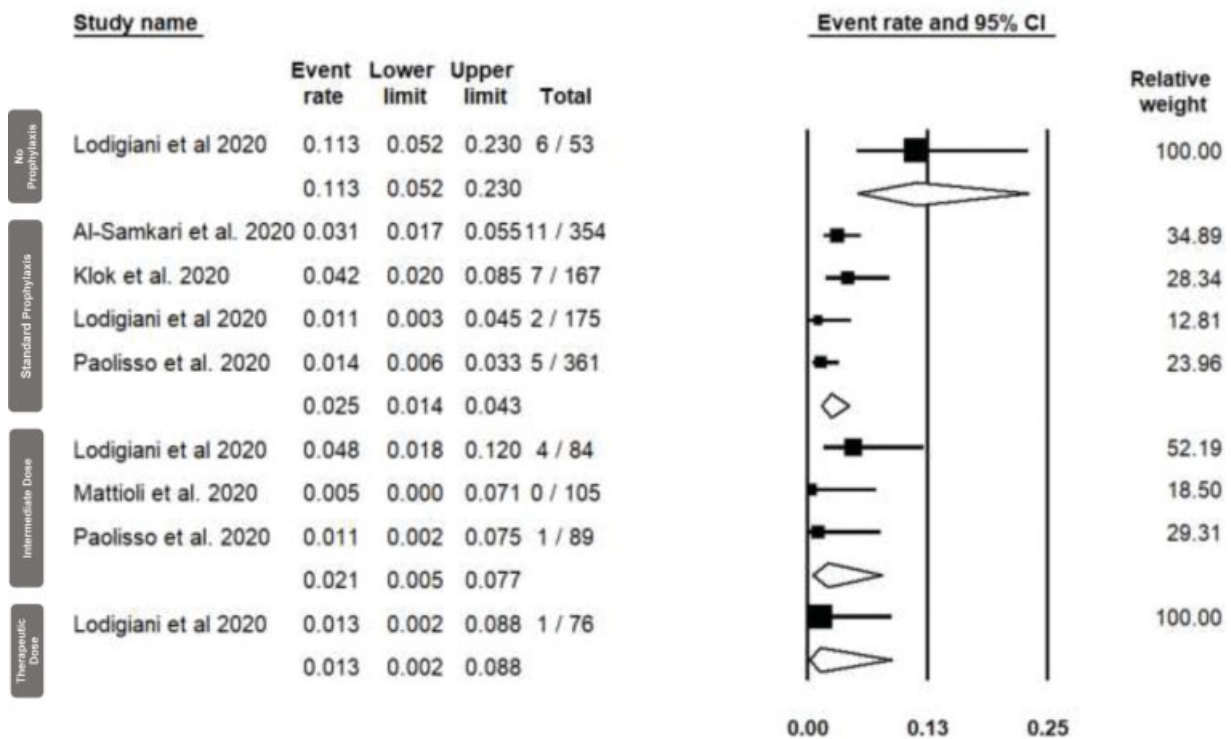

Supplementary Fig. S3 Forest plots showing pooled incidence of total bleeding in each pharmacologic thromboprophylaxis strategy. Bleeding events were extracted as defined by individual studies.

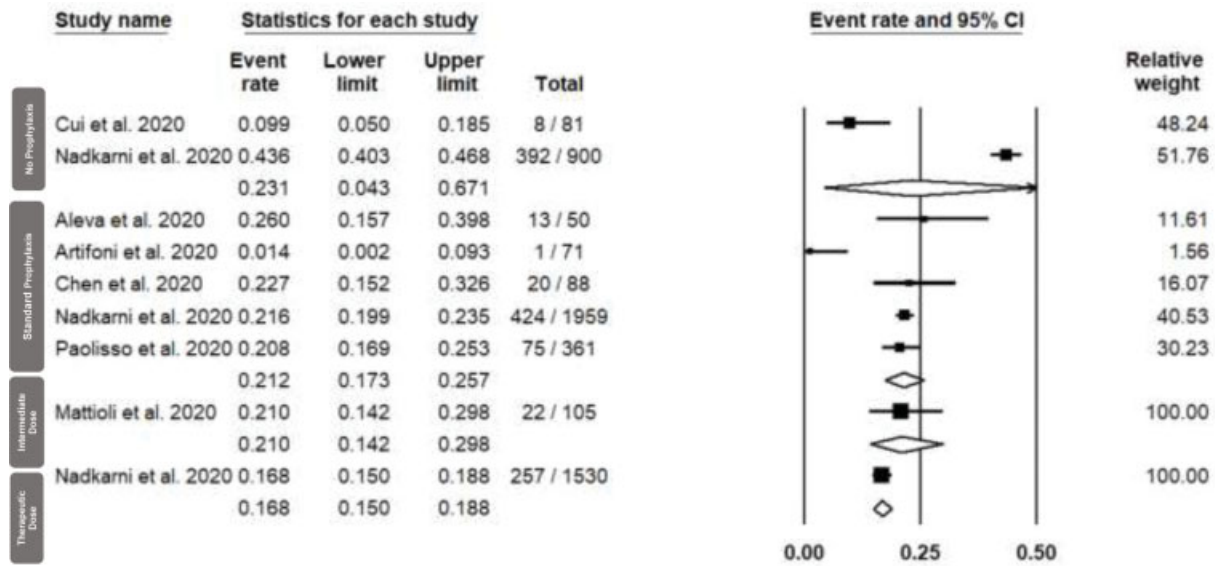

Supplementary Fig. S4 Forest plots showing pooled incidence of overall mortality in each pharmacologic thromboprophylaxis strategy.

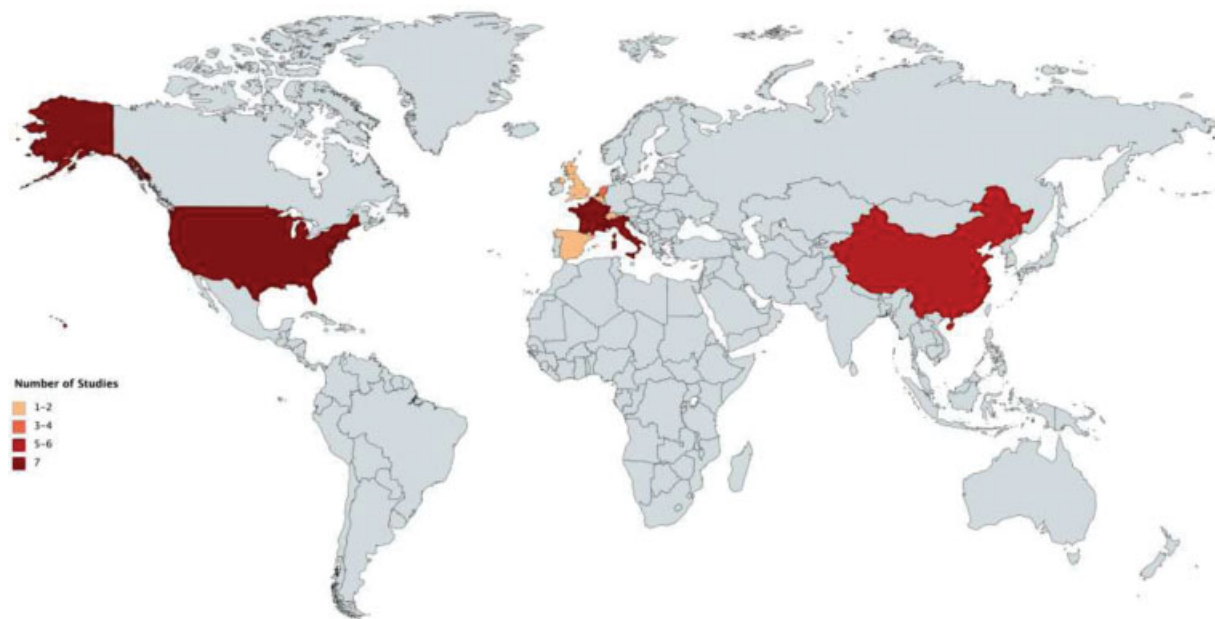

Supplementary Fig. S5 Geographical distribution of included studies.
